# Supplementary material for: Structural characterization of DynU16, a START/Bet v1-like protein involved in dynemicin biosynthesis
Source: PubMed Central journal article supplement (PMC8488855; doi:10.1107/s2053230x21008943), 2021-09-21
Supplement: f-77-00328-sup1.pdf [file f-77-00328-sup1.pdf]

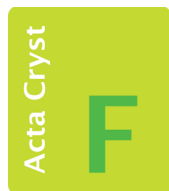

STRUCTURAL BIOLOGY  
COMMUNICATIONS

**Volume 77 (2021)**

**Supporting information for article:**

**Structural characterization of DynU16, a START/Bet v1-like protein involved in dynemicin biosynthesis**

**Sarah K. Alvarado, Mitchell D. Miller, Minakshi Bhardwaj, Jon S. Thorson, Steven G. Van Lanen and George N. Philips**

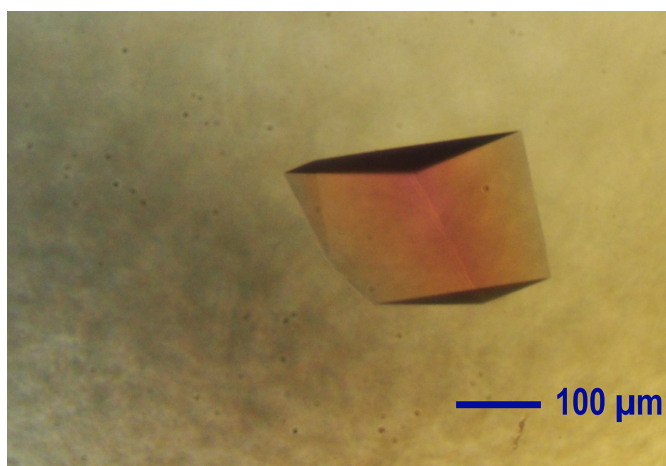

**Figure S1** Crystal of DynU16 imaged with an Olympus BHTP polarizing microscope equipped with an Olympus OM-D E-M5 digital camera.

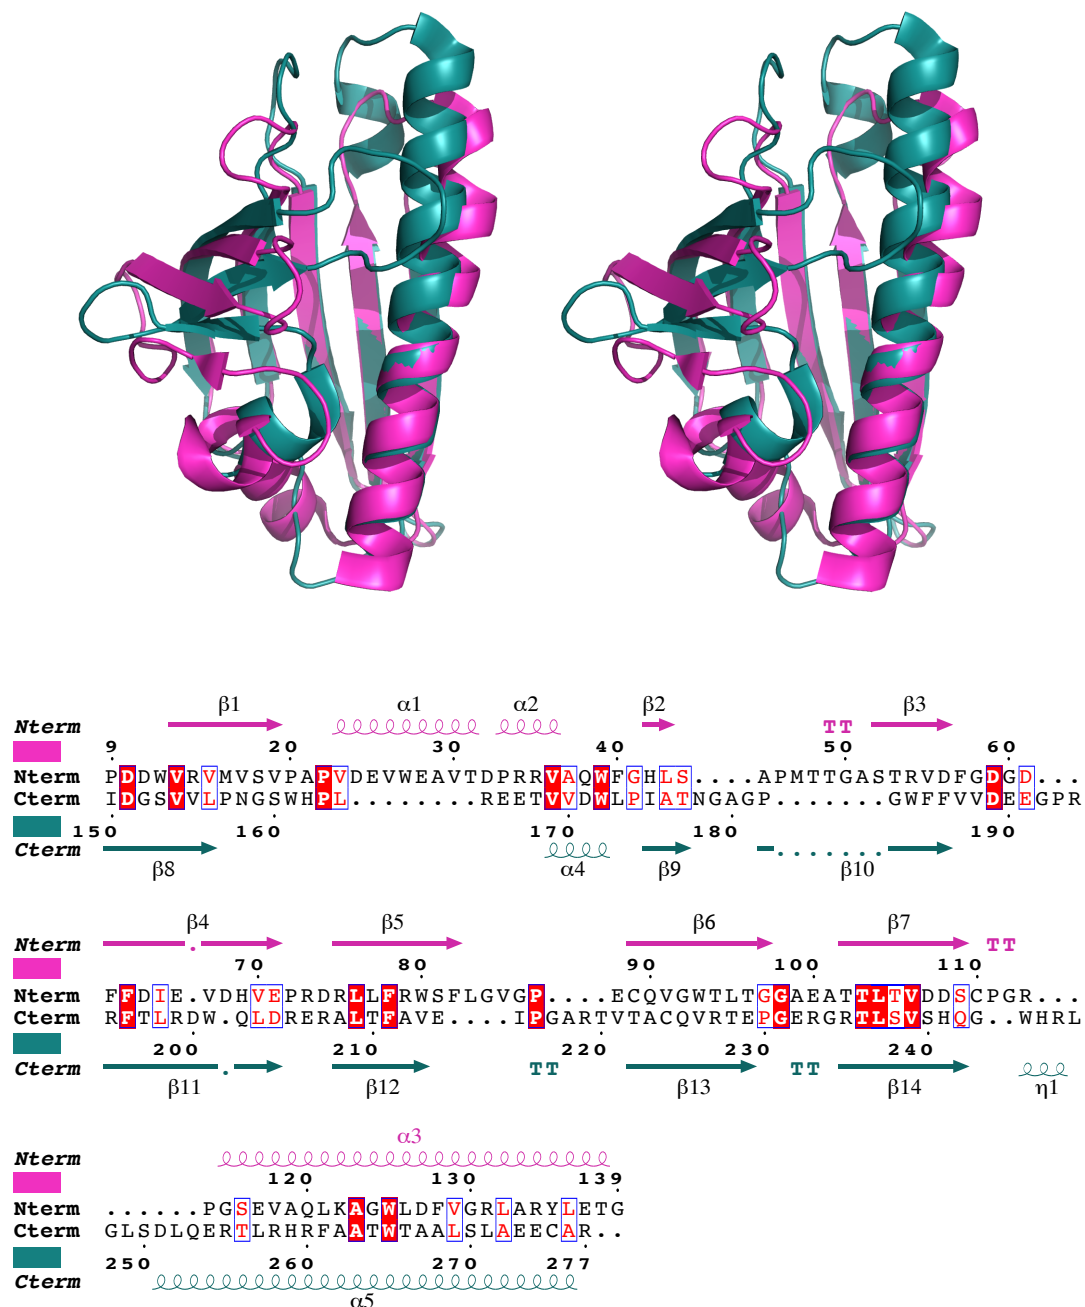

**Figure S2** Superposition of the N-terminal (magenta) and C-terminal (cyan) domains of DynU16 and the resulting sequence alignment produced by the super algorithm in *PyMOL* (v2.4.1, Schrödinger). The structural alignment was based on backbone atom positions. After refinement, the algorithm retained 318 matched atom pairs with an RMSD of 2.0 Å. The resulting sequence alignment aligns 107 residues with 15% identity over this range. The sequence alignment was formatted using *ESPrpt* 3.0 (Robert & Gouet, 2014).

DynU16

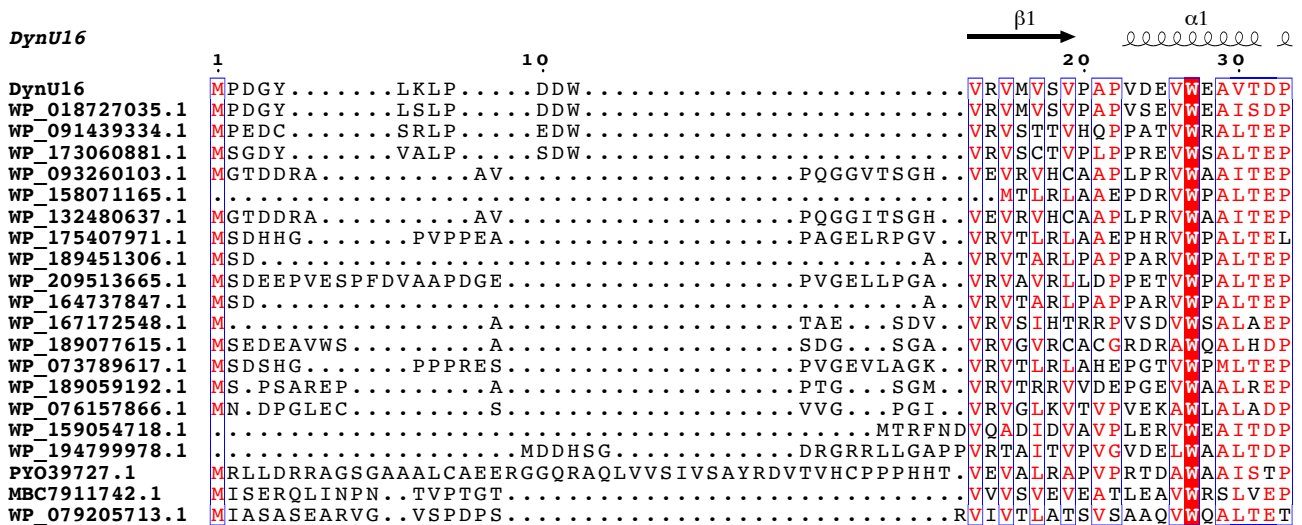

DynU16

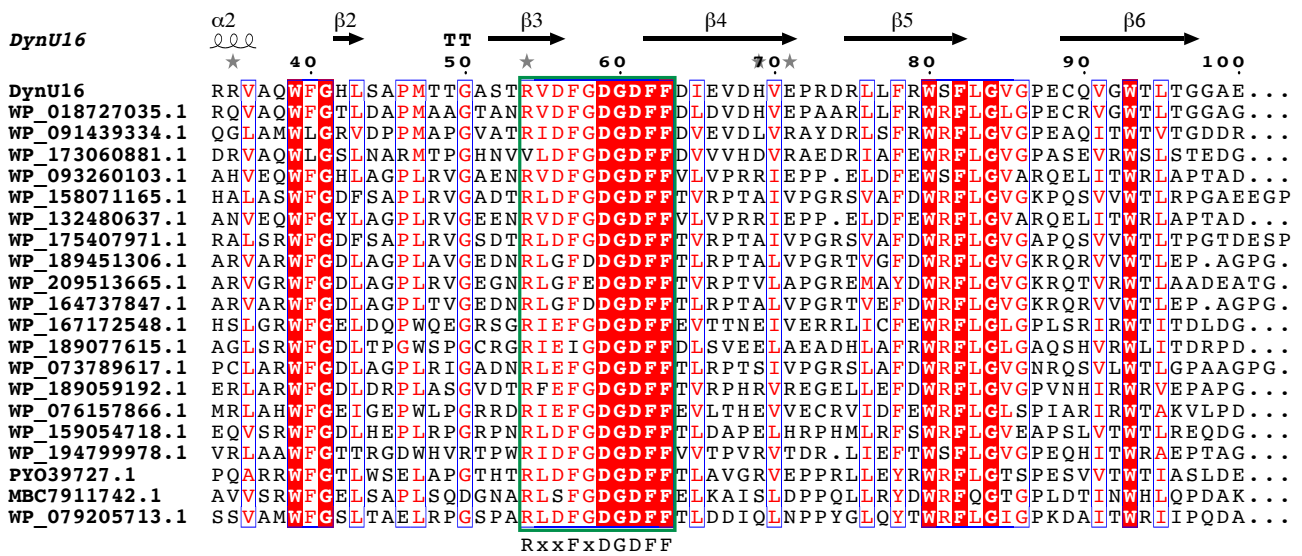

DynU16

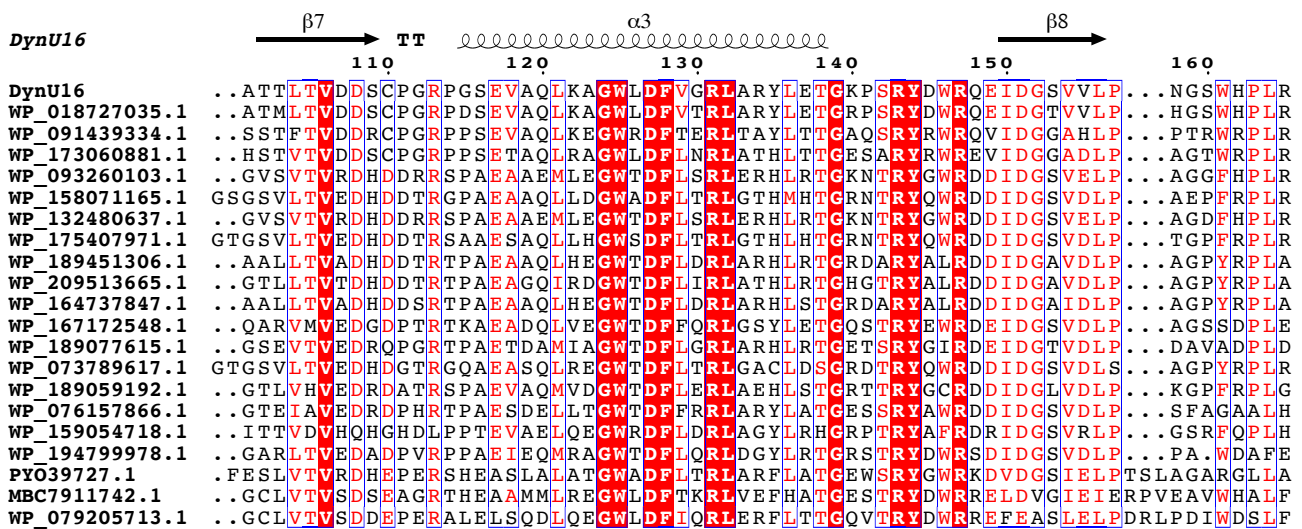

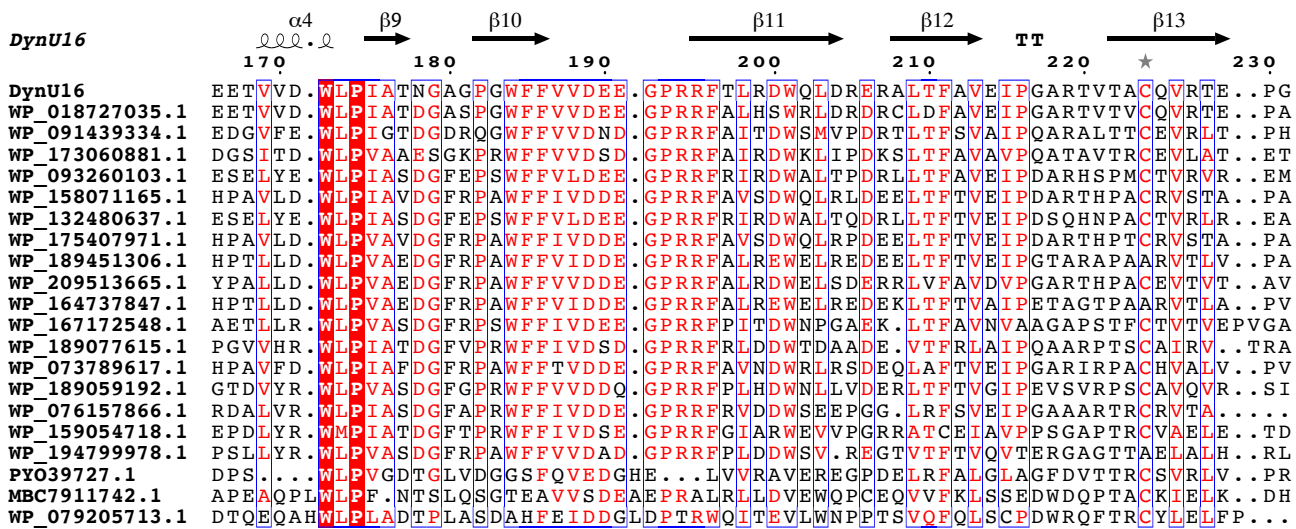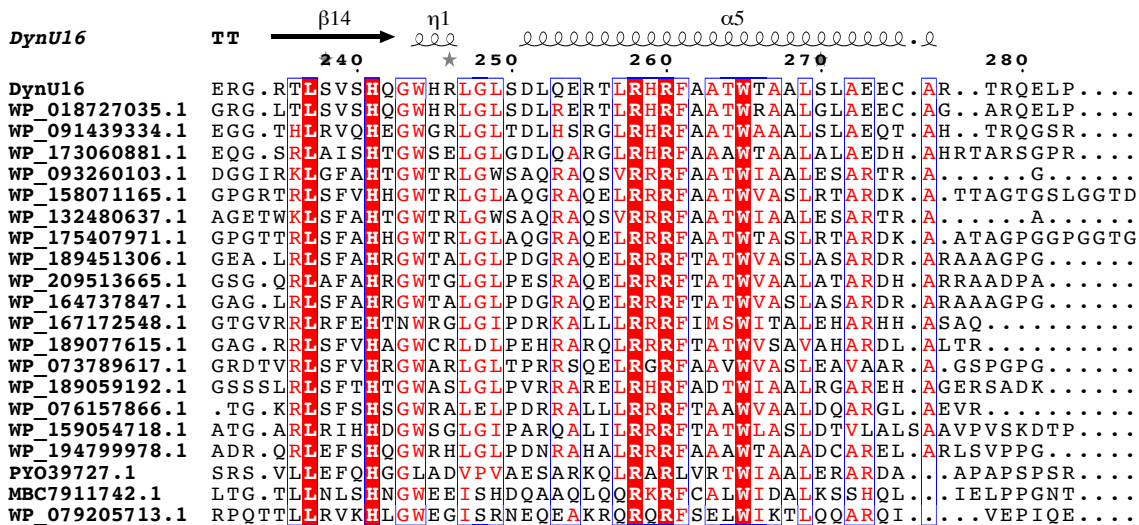

| Accession      | Evalue | %Id | Species                                | Accession      | Evalue | %Id | Species                              |
|----------------|--------|-----|----------------------------------------|----------------|--------|-----|--------------------------------------|
| WP_018727035.1 | 3e-179 | 84% | <i>Salinispora pacifica</i>            | WP_167172548.1 | 5e-77  | 45% | <i>Saccharomonospora amisosensis</i> |
| WP_091439334.1 | 2e-119 | 60% | <i>Micromonospora yangpuensis</i>      | WP_189077615.1 | 2e-76  | 46% | <i>Mangrovihabitans endophyticus</i> |
| WP_173060881.1 | 4e-106 | 56% | <i>Phytohabitans houttuyniae</i>       | WP_073789617.1 | 4e-74  | 47% | <i>Streptomyces uncialis</i>         |
| WP_093260103.1 | 1e-88  | 52% | <i>Saccharopolyspora shandongensis</i> | WP_189059192.1 | 2e-73  | 46% | <i>Longimycelium tulufanense</i>     |
| WP_158071165.1 | 8e-86  | 50% | <i>Streptomyces</i> sp. CB03234        | WP_076157866.1 | 9e-71  | 45% | <i>Amycolatopsis coloradensis</i>    |
| WP_132480637.1 | 2e-85  | 50% | <i>Saccharopolyspora</i> sp. 7K502     | WP_159054718.1 | 2e-70  | 43% | <i>Streptomyces dysideae</i>         |
| WP_175407971.1 | 4e-85  | 50% | <i>Streptomyces</i> sp. TRM64462       | WP_194799978.1 | 5e-69  | 47% | <i>Micromonospora</i> sp. ANENR4     |
| WP_189451306.1 | 3e-80  | 48% | <i>Streptomyces abikoensis</i>         | PYO39727.1     | 3e-49  | 36% | <i>Gemmatimonadetes</i> bacterium    |
| WP_209513665.1 | 1e-79  | 47% | <i>Streptomyces syringium</i>          | MBC7911742.1   | 1e-48  | 33% | <i>Pyrinomonadaceae</i> bacterium    |
| WP_164737847.1 | 1e-79  | 48% | <i>Streptomyces luteoverticillatus</i> | WP_079205713.1 | 1e-47  | 33% | <i>Microcystis aeruginosa</i>        |

**Figure S3** Sequence alignment and blast E-values for 20 di-domain homologs to DynU16 identified with NCBI blast (Altschul et al., 1997). These homologs have at least 90% coverage and over 30% identity and were clustered to retain only a single representative sequence at 98% sequence identity. The RxxFxDGDFD motif is highlighted in a green box between strands β3 and β4. Many of the residues across all 21 proteins line the cavity with the majority of the residues from the N-terminal domain. Most of the remaining conserved residues stabilize packing between secondary structure elements. The alignment was formatted using *ESPrpt* 3.0 (Robert & Gouet, 2014).
